# Supplementary material for: Salvage Radiotherapy versus Observation for Biochemical Recurrence following Radical Prostatectomy for Prostate Cancer: A Matched Pair Analysis
Source: MDPI journal article supplement (doi:10.3390/cancers14030740), 2022-01-31
Supplement: s1 [file s1]

## Supplementary material

**Table S1.** Multivariable Cox regression predicting metastasis and death of patients with biochemical recurrence after radical prostatectomy and 1:1 matching, stratified according to salvage radiotherapy vs. observation, sensitivity analysis at 6 months.

|                                   | Metastasis       |         | Death            |         |
|-----------------------------------|------------------|---------|------------------|---------|
|                                   | HR (95%-CI)      | p-value | HR (95%-CI)      | p-value |
| No sRT (reference)                | -                | -       | -                | -       |
| sRT                               | 0.46 (0.31-0.68) | <0.001  | 0.62 (0.42-0.93) | 0.02    |
| Year of surgery                   | 1.19 (1.13-1.25) | <0.001  | 0.99 (0.95-1.05) | 0.9     |
| Age                               | 0.97 (0.94-0.99) | 0.02    | 1.03 (0.99-1.07) | 0.1     |
| Preoperative PSA                  | 1.01 (0.98-1.02) | 0.9     | 1.01 (0.99-1.02) | 0.2     |
| Pathologic stage ≤T2c (reference) | -                | -       | -                | -       |
| Pathologic stage T3a              | 2.13 (1.32-3.44) | <0.01   | 2.02 (1.19-3.43) | <0.01   |
| Pathologic stage T3b              | 3.67 (2.13-6.32) | <0.001  | 3.89 (2.22-6.84) | <0.001  |
| Pathologic stage T4               | 5.33 (1.72-16.6) | <0.01   | 3.29 (1.21-8.99) | 0.02    |
| GG1 (reference)                   | -                | -       | -                | -       |
| GG2                               | 1.56 (0.85-2.86) | 0.2     | 1.40 (0.80-2.45) | 0.2     |
| GG3                               | 1.89 (0.95-3.73) | 0.1     | 2.04 (1.08-3.85) | 0.03    |
| GG4-5                             | 3.59 (1.79-7.22) | <0.001  | 2.79 (1.46-5.31) | <0.01   |
| Positive surgical margin          | 0.85 (0.56-1.28) | 0.4     | 1.41 (0.95-2.11) | 0.1     |

Abbreviations: GG – Gleason grade group; sRT – salvage radiotherapy; PSA – prostatic specific antigen value;.

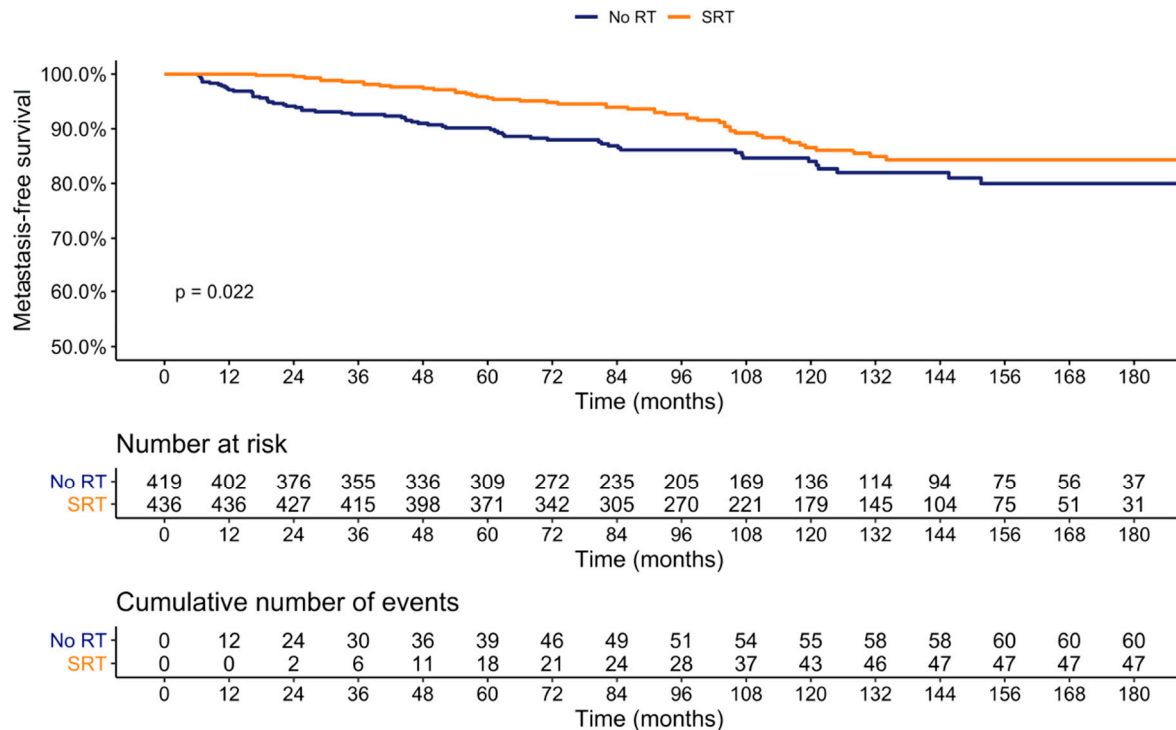

**Figure S1.** Kaplan-Meier plot depicting metastasis free survival rates in prostate cancer patients treated with radical prostatectomy stratified according to observation vs. SRT for BCR, after 1:1 propensity score matching, sensitivity analysis at six months.

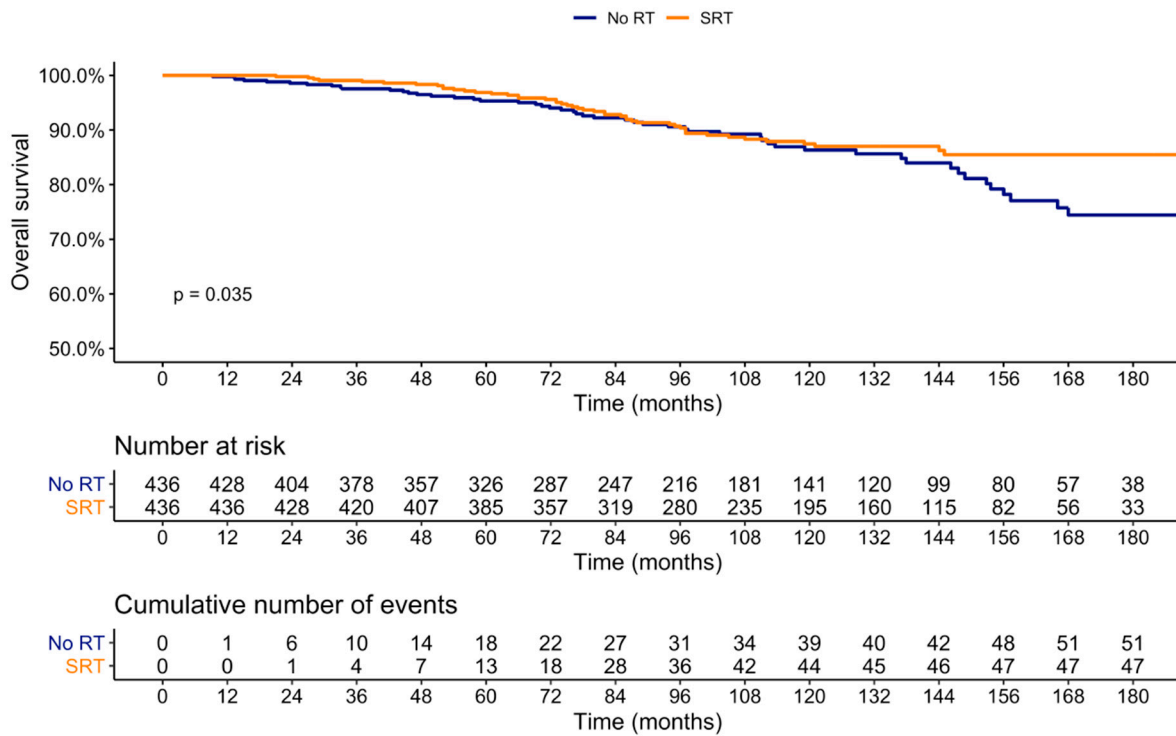

**Figure S2.** Kaplan-Meier plot depicting overall survival rates in prostate cancer patients treated with radical prostatectomy stratified according to observation vs. SRT for BCR, after 1:1 propensity score matching, sensitivity analysis at six months.
